# Supplementary material for: Enhanced Expression of ARK5 in Hepatic Stellate Cell and Hepatocyte Synergistically Promote Liver Fibrosis
Source: MDPI journal article supplement (doi:10.3390/ijms232113084), 2022-10-28
Supplement: s1 [file s1]

## Supplementary Material

### Supplementary Figures

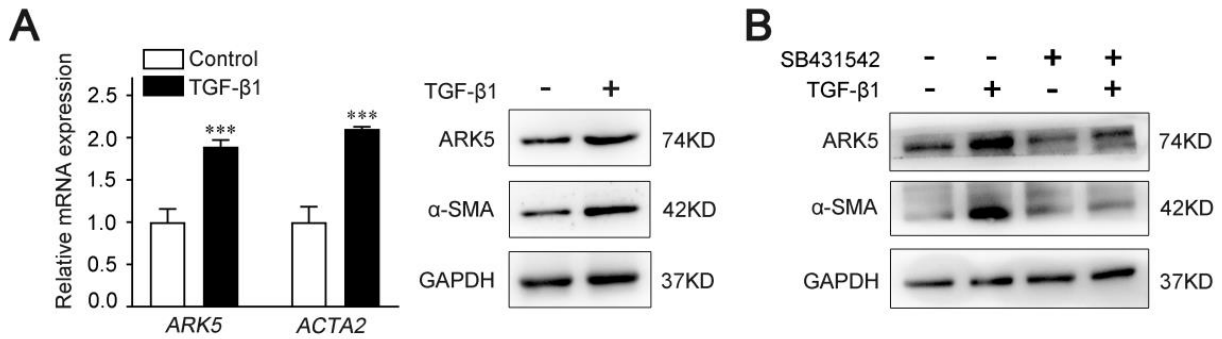

**Figure S1. TGF-β1 induces increased ARK5 expression in LX2.** (A) qPCR and Western blot for ARK5 and α-SMA in LX2 treated with or without TGF-β1 for 48 h. (B) Western blot for ARK5 and α-SMA in LX2 cells in indicated conditions. Cells were treated with SB431542 (10 mM), TGF-β1 (10 ng/ml) or SB431542 plus TGF-β1 for 48 h. \*\*\*  $p < 0.001$  versus Control group.

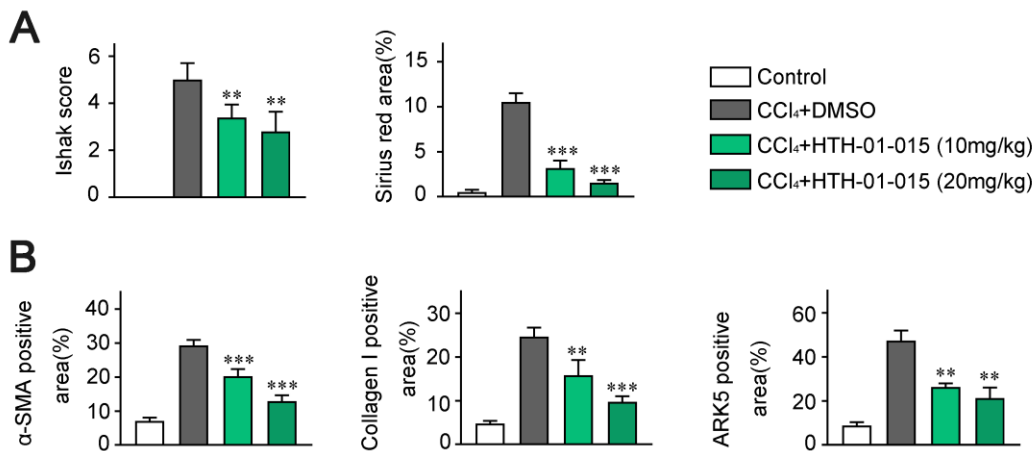

**Figure S2. Histological statistical analysis of the treatment effect of HTH-01-15.** (A) HTH-01-015 reduced Ishak fibrosis score and Sirius red staining area. (B) HTH-01-015 reduced the immunohistochemical staining area of α-SMA and Collagen I and ARK5. Mean ± SD ( $n = 3$  per group). \*\*  $p < 0.01$ , and \*\*\*  $p < 0.001$  versus CCl<sub>4</sub> + DMSO group.
